# Supplementary material
Source: PubMed Central journal article supplement (PMC6232081)
Supplement: NIHMS994712-supplement-Supplemental_Information.pdf [file NIHMS994712-supplement-Supplemental_Information.pdf]

## Supporting Information

### Implantable Tin Porphyrin-PEG Hydrogels with pH-responsive Fluorescence

Haoyuan Huang<sup>a</sup>, Saurabh Chauhan<sup>b</sup>, Jumin Geng<sup>a</sup>, Yiru Qin<sup>a</sup>, David F. Watson<sup>b</sup>, Jonathan F. Lovell<sup>a\*</sup>

<sup>a</sup> Department of Biomedical Engineering, University at Buffalo, State University of New York, Buffalo, NY, USA

<sup>b</sup> Department of Chemistry, University at Buffalo, State University of New York, Buffalo, NY, USA

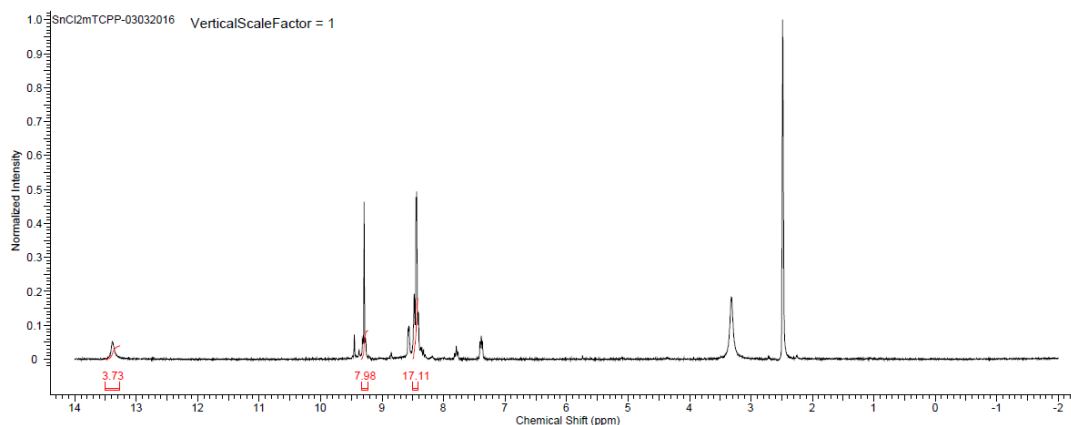

**Fig. S1 NMR of SnCl<sub>2</sub>mTCCP hydrogels.** The peak at 3.33 ppm is water in (CD<sub>3</sub>)<sub>2</sub>SO [1].

[1] G.R. Fulmer, A.J.M. Miller, N.H. Sherden, H.E. Gottlieb, A. Nudelman, B.M. Stoltz, J.E. Bercaw, K.I. Goldberg, NMR Chemical Shifts of Trace Impurities: Common Laboratory Solvents, Organics, and Gases in Deuterated Solvents Relevant to the Organometallic Chemist, *Organometallics* 29(9) (2010) 2176-2179.

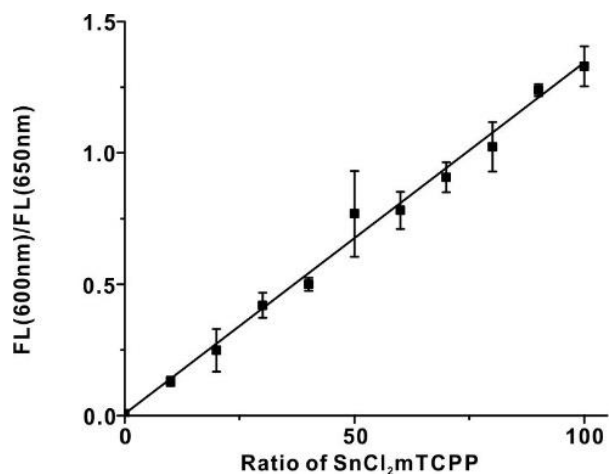

**Fig. S2 Standard curve of SnCl<sub>2</sub>mTCPP concentration ratio and fluorescent intensities ratio of 600 nm and 650 nm,  $R^2=0.99838$ . Data show mean +/- std. dev. for n=3 separate polymerization reactions and purifications.**

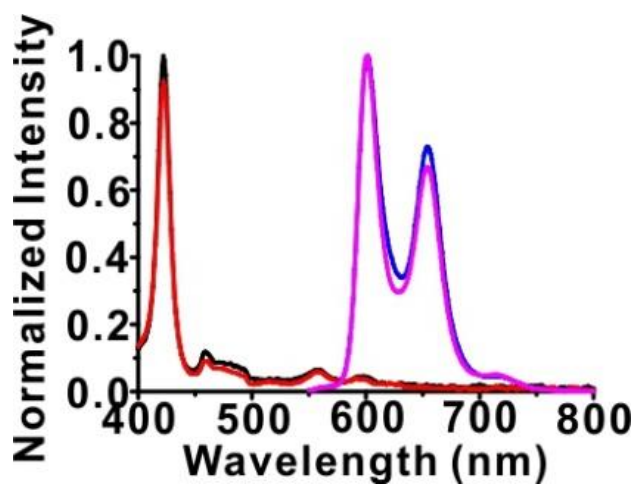

**Fig S3. Absorbance spectra of synthesized SnCl<sub>2</sub>mTCPP (black) and the post chelated one (red), and their emission spectra (blue for synthesized sample and purple for post chelated one).**

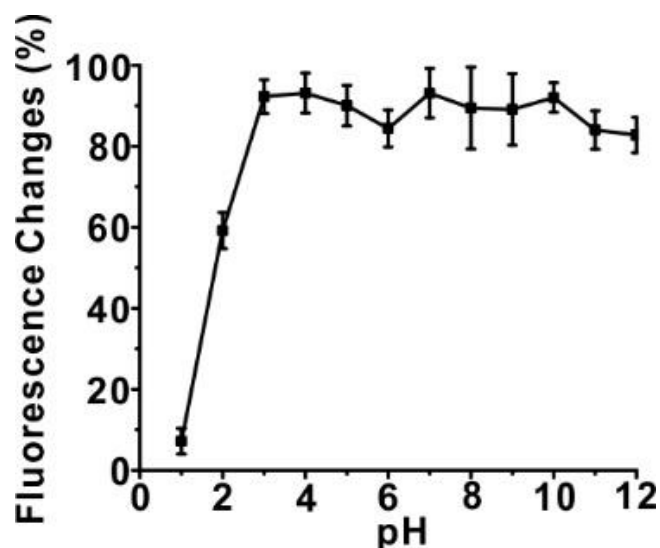

**Fig S4. pH sensitivity of 2H-mTCPP hydrogels in pH=1-12 100mM sodium phosphate.** Data show mean +/- std. dev. for n=3 separate polymerization reactions and purifications.

**Table S1. Lifetime values and corresponding fitted parameters of tin hydrogel**

| pH | A <sub>1</sub> | τ <sub>1</sub> (ns) | A <sub>2</sub> | τ <sub>2</sub> (ns) | <τ> (ns) |
|----|----------------|---------------------|----------------|---------------------|----------|
| 1  | 0.02±0.005     | 2.2±0.3             | 0.98±0.03      | 0.8±0.02            | 0.9±0.05 |
| 2  | 0.16±0.02      | 1.7±0.1             | 0.84±0.04      | 0.9±0.03            | 1.1±0.09 |
| 3  | 0.48±0.008     | 1.3±0.01            | 0.52±0.02      | 0.5±0.01            | 1.1±0.02 |
| 4  | 0.62±0.05      | 1.4±0.06            | 0.38±0.06      | 0.7±0.1             | 1.2±0.1  |
| 5  | 0.46±0.03      | 1.5±0.05            | 0.54±0.04      | 0.7±0.05            | 1.2±0.09 |
| 6  | 0.58±0.04      | 1.4±0.06            | 0.42±0.06      | 0.6±0.08            | 1.2±0.1  |
| 7  | 0.73±0.03      | 1.6±0.02            | 0.27±0.03      | 0.7±0.07            | 1.5±0.06 |
| 8  | 0.97±0.02      | 1.5±0.02            | 0.03±0.007     | 3.1±0.6             | 1.6±0.08 |
| 9  | 0.97±0.02      | 1.6±0.02            | 0.03±0.009     | 2.8±0.6             | 1.6±0.09 |
| 10 | 0.75±0.02      | 1.7±0.02            | 0.25±0.02      | 1.0±0.06            | 1.6±0.05 |
| 11 | 0.37±0.009     | 1.8±0.03            | 0.63±0.01      | 1.3±0.02            | 1.6±0.04 |
| 12 | 1±0*           | 1.6±0.01*           |                |                     | 1.6±0.1* |

\* mono-exponential decay
